# Supplementary material
Source: publisher figshare collection journal article supplement (https://acs.figshare.com/ndownloader/files/10685341)
Supplement: Supplementary file 1 [file 10685341]

# Supporting Information

## “Click-Mediated Pretargeted Radioimmunotherapy of Colorectal Carcinoma”

Rosemary Membreno<sup>1,2</sup>, Brendon E. Cook<sup>1,2</sup>, Kimberly Fung<sup>1,2</sup>, Jason S. Lewis<sup>3,4,6</sup>, Brian M. Zeglis<sup>1,2,3,4,\*</sup>

1. Department of Chemistry, Hunter College of the City University of New York, New York, NY, 10065

2. Ph.D. Program in Chemistry, The Graduate Center of the City University of New York, New York, NY, 10016

3. Department of Radiology, Memorial Sloan Kettering Cancer Center, New York, NY, 10065

4. Department of Radiology, Weill Cornell Medical College, New York, NY, 10065

5. Program in Molecular Pharmacology and Chemistry, Memorial Sloan Kettering Cancer Center, New York, NY, 10065

### **Methods and Materials**

Unless otherwise noted, all chemicals were purchased from Sigma-Aldrich (St. Louis, MO) and were used without further purification. All water used was ultrapure ( $>18.2 \text{ M}\Omega\text{cm}^{-1}$  at  $25^\circ\text{C}$ ), all DMSO was of molecular biology grade ( $>99.9\%$ ), and all other solvents were of the highest grade commercially available. Amine-reactive *trans*-cyclooctene [(E)-cyclooct-4-enyl 2,5-dioxo-1-pyrrolidinyl carbonate; TCO-NHS] and amine-reactive tetrazine [*N*-(4-(1,2,4,5-tetrazin-3-yl)benzyl)-6-(2,5-dioxopyrrolidin-1-yl)-5-oxohexanamide; Tz-NHS] were purchased from Sigma-Aldrich (St. Louis, MO). *p*-SCN-Bn-DOTA chelator was purchased from Macrocyclics, Inc. (Dallas, TX).  $^{177}\text{Lu}$  was procured from PerkinElmer (PerkinElmer Life and Analytical Sciences, Wellesley, MA) as  $^{177}\text{LuCl}_3$  in 0.05 M HCl.  $^{64}\text{Cu}$  was obtained from Washington University (St. Louis MO) as  $\text{CuCl}_2$  in 0.1 M HCl. The huA33 antibody was produced by the Ludwig Institute and the Olivia Newton-John Cancer Research Institute as previously described<sup>1</sup>.  
<sup>2</sup>. Amine-reactive AlexaFluor 680 (AF680-NHS) was purchased from ThermoFisher Scientific (Waltham, MA). All experiments involving laboratory animals were performed in accordance with a protocol approved by the Weill Cornell Medical Center, Hunter College, and Memorial Sloan Kettering Institutional Animal Care and Use Committees.

### **Instrumentation**

All instruments were calibrated and maintained in accordance with standard quality-control procedures. UV-Vis measurements were taken on a Shimadzu BioSpec-Nano Spectrophotometer. Activity measurements were made using a Capintec CRC-15R Dose Calibrator (Capintec, Ramsey, NJ). Biodistribution samples were counted for activity for 1 min on a Perkin Elmer (Waltham, MA) Automatic Wizard<sup>2</sup> Gamma Counter. Instant thin-layer chromatography (iTLC) for radio-iTLC experiments were performed on strips of glass-fiber, silica-impregnated paper (Pall Corp., East Hills, NY), read on a Bioscan AR-2000 Radio-TLC plate reader, and analyzed using Winscan Radio-TLC software (Bioscan Inc., Washington, D. C.). All PET imaging experiments were performed on Focus 120 PET scanner (Siemens Healthcare Global).

**HPLC:** All HPLC purifications (Buffer A: 0.1% TFA in water, Buffer B: 0.1% TFA in CH<sub>3</sub>CN) were performed on a Shimadzu UFLC HPLC system equipped with a DGU-20A degasser, a SPD-M20A UV detector, two LC-20AP pump systems, a CBM-20A communication BUS module, and a FRC-10A fraction collector using a reversed-phase C<sub>18</sub> XTerra® Preparative MS OBDTM column (10 µm, 19.2 mm × 250 mm; 10 mL/min) or a reversed-phase C<sub>18</sub> semi-Prep Phenomenex® Jupiter column (5 µm, 10 mm × 250 mm; 2 mL/min). Analytical HPLC runs were performed using a reversed-phase C<sub>18</sub> Phenomenex® Jupiter column (5 µm, 4.6 mm × 250 mm; 1 mL/min). All radio-HPLC analyses and purifications were performed using a Shimadzu HPLC equipped with a reversed-phase C<sub>18</sub> column (Phenomenex® Luna analytical 4.6 x 250 mm; 1 mL/min), 2 LC-10AT pumps, a SPD-M10AVP photodiode array detector, and a Bioscan Flow Counts radioactivity detector with a gradient of 5:95 CH<sub>3</sub>CN:H<sub>2</sub>O (both with 0.1% TFA) to 95:5 CH<sub>3</sub>CN:H<sub>2</sub>O over 15 min

### ***Synthesis and Characterization***

**Preparation of huA33-TCO:** An aliquot of huA33 (1.6 mg, 10.7 nmol) was dissolved in 500 µL of phosphate buffered saline (PBS, pH 7.4), and the pH of the solution was adjusted to 8.8-9.0 with Na<sub>2</sub>CO<sub>3</sub> (0.1 M). A volume of TCO-NHS in DMF (25 mg/mL) was added to yield a TCO-NHS:huA33 reaction stoichiometry of 40:1. The resulting solution was incubated at 25 °C for 1 hour with shaking at 400 rpm. After 1 hour, the modified antibody was purified using size-exclusion chromatography (Sephadex G-25M, PD-10 column, GE Healthcare; dead volume = 2.5 mL, eluted with a 2 mL fraction of PBS, pH 7.4) and concentrated using centrifugal filtration units with a 50,000 Da molecular weight cut off (Amicon™ Ultra 2mL, Millipore Corp., Billerica, MA) and PBS (pH 7.4).

**Preparation of huA33-CHX-A"-DTPA:** An aliquot of huA33 (1.2 mg, 8.0 nmol) was dissolved in 500 µL of PBS (pH 7.4), and the pH of the solution was adjusted to ~8.8 using 0.1 M Na<sub>2</sub>CO<sub>3</sub>. A volume of CHX-A"-DTPA in DMSO (25 mg/mL) was added to yield a CHX-A"-DTPA:huA33 reaction stoichiometry ratio of 20:1. The resulting solution was incubated at 25 °C for 1.5 hours with shaking at 350 rpm. The modified antibody was then purified using size-exclusion chromatography (Sephadex G-25M, PD-10 column, GE Healthcare; dead volume = 2.5 mL, eluted with a 2 mL fraction of PBS, pH 7.4) and concentrated with centrifugal filtration units with a 50,000 Da molecular weight cut off (Amicon™ Ultra 2mL, Millipore Corp., Billerica, MA) and PBS (pH 7.4).

**Synthesis of tert-butyl (1-(4-(1,2,4,5-tetrazin-3-yl)phenyl)-3,7-dioxo-11,14,17,20,23,26,29-heptaoxa-2,8-diazahentriacontan-31-yl)carbamate (**Tz-PEG<sub>7</sub>-NHBoc**; **1**):** Tz-PEG<sub>7</sub>-NHBoc was prepared as previously described<sup>3</sup>. Tz-NHS (10 mg; 0.025 mmol; 398.4 g/mol) was dissolved in 400 µL DMSO and added to 15 mg *O*-(2-aminoethyl)-*O'*-[2-(bocamino)ethyl]hexaethylene glycol (0.032 mmol; 1.3 equiv.; 468.6 g/mol). To this solution, 10 µL triethylamine (7.3 mg; 0.072 mmol; 101.2 g/mol) was then added, and the solution was placed on a thermomixer at 300 rpm at 25 °C. After 30 minutes, the reaction was purified via preparative C<sub>18</sub> HPLC using a gradient of 5:95 CH<sub>3</sub>CN:H<sub>2</sub>O (both with 0.1% TFA) to 95:5 CH<sub>3</sub>CN:H<sub>2</sub>O over 30 min (t<sub>R</sub> = 18.2 min). Lyophilization of the HPLC eluent yielded the purified product as 16 mg of a bright pink powder (MW = 751.9 g/mol; 0.021 mmol; 85% yield). <sup>1</sup>H NMR (500 MHz, DMSO), δ,

ppm: 10.52 (s, 1H), 8.50 (m, 3H), 7.82 (t, 1H), 7.46 (d, 2H), 6.69 (t, 1H), 4.33 (d, 2H), 3.42 (m, 22H), 3.33 (t, 2H), 3.31 (t, 2H), 3.12 (q, 2H), 2.99 (q, 2H), 2.12 (t, 2H), 2.03 (t, 2H), 2.12 (t, 2H), 1.70 (q, 2H), 1.29 (s, 9H). ESI-MS(+):  $m/z$  (%) = 753.1  $[M+H]^+$  HRMS (ESI):  $m/z$  calcd. for  $C_{35}H_{57}N_7O_{11}Na$ : 774.4005; found: 774.4014. UV-Vis:  $\epsilon_{525} = 530 \text{ M}^{-1}\text{cm}^{-1}$ .

*Synthesis of  $N^1$ -(4-(1,2,4,5-tetrazin-3-yl)benzyl)- $N^5$ -(23-amino-3,6,9,12,15,18,21-heptaooxatricosyl)glutaramide (Tz-PEG<sub>7</sub>-NH<sub>2</sub>; 2):* Tz-PEG<sub>7</sub>-NH<sub>2</sub> was prepared as previously described<sup>3</sup>. Tz-PEG<sub>7</sub>-NHBoc (**1**, 10 mg; 0.014 mmol; 717.5 g/mol) was first dissolved in 400  $\mu\text{L}$  of 1:1  $\text{CH}_2\text{Cl}_2$ :TFA and placed on an agitating thermomixer at 300 rpm for 30 minutes at 25 °C. After 30 minutes, the solvent was removed via rotary evaporation, the residue was taken back up in  $\text{H}_2\text{O}$ , and the reaction was purified via preparative  $\text{C}_{18}$  HPLC using a gradient of 5:95  $\text{CH}_3\text{CN}$ : $\text{H}_2\text{O}$  (both with 0.1% TFA) to 95:5  $\text{CH}_3\text{CN}$ : $\text{H}_2\text{O}$  over 30 min ( $t_R = 12.5$  min). Lyophilization of the HPLC eluent yielded the purified product as 9 mg of a bright pink powder (MW = 651.7; 0.013 mmol; 95% yield).  $^1\text{H}$  NMR (500 MHz, DMSO),  $\delta$ , ppm: 10.58 (s, 1H), 8.46 (m, 2H), 7.87 (t, 1H), 7.75 (d, 2H), 7.52 (d, 1H), 4.40 (d, 2H), 3.60-3.50 (m, 26H), 3.40 (t, 2H), 3.32 (bs, 2H), 3.20 (q, 2H), 2.99 (bs, 2H), 2.19 (t, 2H), 2.12 (t, 2H), 1.79 (q, 2H). ESI-MS(+):  $m/z$  (%) = 652.9  $[M+H]^+$  HRMS (ESI):  $m/z$  calcd. for  $\text{C}_{30}\text{H}_{50}\text{N}_7\text{O}_9$ : 652.3670; found: 652.3676. UV-Vis:  $\epsilon_{525} = 535 \text{ M}^{-1}\text{cm}^{-1}$ .

*Synthesis of 2,2',2'',2'''-(2-(4-(3-(1-([3,3'-bi(1,2,4,5-tetrazin)]-6-yl)-3,7-dioxo-11,14,17,20,23,26,29-heptaooxa-2,8-diazahentriacontan-31-yl)thioureido)benzyl)-1,4,7,10-tetraazacyclododecane-1,4,7,10-tetrayl)tetraacetic acid (DOTA-PEG<sub>7</sub>-Tz ; 3):* DOTA-PEG<sub>7</sub>-Tz was prepared as previously described<sup>3</sup>. A portion of Tz-PEG<sub>7</sub>-NH<sub>2</sub> (**2**, 11.5 mg; 0.0176 mmol; 652.4 g/mol) was dissolved in 400  $\mu\text{L}$  DMSO and added to 14.8 mg  $p$ -SCN-Bn-DOTA (0.0022 mmol; 1.2 equiv.; 688.0 g/mol). 20  $\mu\text{L}$  triethylamine (14.8 mg; 0.15 mmol; 101.2 g/mol) was then added to this solution, and the solution was placed on an agitating thermomixer at 300 rpm for 60 minutes at 25 °C. After 60 minutes, the reaction was purified via preparative  $\text{C}_{18}$  HPLC using a gradient of 5:95  $\text{CH}_3\text{CN}$ : $\text{H}_2\text{O}$  (both with 0.1% TFA) to 95:5  $\text{CH}_3\text{CN}$ : $\text{H}_2\text{O}$  over 30 min ( $t_R = 20.7$  min). Lyophilization of the HPLC eluent yielded 15.4 mg of purified product as a bright pink powder (MW = 1203.4; 0.0128 mmol; 72.7% yield).  $^1\text{H}$  NMR (500 MHz, DMSO),  $\delta$ , ppm: 10.57 (s, 1H), 9.63 (bs, 1H), 8.45 (m, 3H), 7.86 (m, 1H), 7.73 (bs, 1H), 7.54 (d, 2H), 7.41 (m, 2H), 7.19 (m, 2H), 6.54 (bs, 1H), 4.40 (d, 2H), 4.00-3.20 (m, 55H), 3.20 (q, 4H), 2.54 (s, 1H), 2.18 (t, 3H), 2.10 (t, 3H), 1.76 (q, 2H). ESI-MS(-):  $m/z$  (%) = 1203.0  $[M-H]^-$ ; 601.8  $[M-2H]^{2-}$  HRMS (ESI):  $m/z$  calcd. for  $\text{C}_{50}\text{H}_{76}\text{N}_{11}\text{O}_{15}\text{S}$ : 1202.56; found: 1203.5741.

*Synthesis of 3-(2-((1E,3E)-5-((Z)-3-(1-(4-(1,2,4,5-tetrazin-3-yl)phenyl)-3,7,33-trioxo-11,14,17,20,23,26,29-heptaooxa-2,8,32-triazaoctatriacontan-38-yl)-3-methyl-5-sulfo-1-(3-sulfopropyl)indolin-2-ylidene)penta-1,3-dien-1-yl)-5-bromo-3,3-dimethyl-3H-pyrrolo[2,3-b]pyridin-7-ium-7-yl)propane-1-sulfonate (Tz-PEG<sub>7</sub>-AF680; 5):* A portion of Tz-PEG<sub>7</sub>-NH<sub>2</sub> (**1** mg; 0.0015 mmol; 651.8 g/mol) was dissolved in 400  $\mu\text{L}$  DMSO and added to 2 mg AF680-NHS (0.0021 mmol; 1.4 equiv.; 955.9 g/mol). 10  $\mu\text{L}$  triethylamine (7.3 mg; 0.072 mmol; 101.2 g/mol) was then added to this solution, and the solution was placed on an agitating thermomixer at 300 rpm for 30 minutes at 25 °C. After 30 minutes, the reaction was purified via preparative  $\text{C}_{18}$  HPLC using a gradient of 5:95  $\text{CH}_3\text{CN}$ : $\text{H}_2\text{O}$  (both with 0.1% TFA) to 95:5  $\text{CH}_3\text{CN}$ : $\text{H}_2\text{O}$  over 30 min ( $t_R = 11.2$  min). Lyophilization of the HPLC eluent yielded the purified product as a 2 mg of a deep blue powder (MW 1492.6; 0.0013 mmol; 79% yield).

## ***Radiolabeling***

*Preparation of  $^{177}\text{Lu}$ -DOTA-PEG<sub>7</sub>-Tz:*  $^{177}\text{Lu}$ -DOTA-PEG<sub>7</sub>-Tz was prepared as previously described<sup>3</sup>. A solution of DOTA-PEG<sub>7</sub>-Tz (5–25  $\mu\text{g}$ ; 4.1–20.7 nmol) in  $\text{NH}_4\text{OAc}$  buffer (0.25 M, pH 5.5, 200  $\mu\text{L}$ ) was first prepared. Then, the desired amount of  $^{177}\text{LuCl}_3$  in 0.1 M HCl (1500–7500  $\mu\text{Ci}$ ; 55.5–277.5 MBq) was added to the reaction mixture, and the solution was placed on an agitating thermomixer at 300 rpm for 10 min at 25 °C. After this incubation, the progress of the  $^{177}\text{Lu}$ -DOTA-PEG<sub>7</sub>-Tz radiolabeling was determined by iTLC which revealed quantitative labeling of >98% radionuclidic purity, thus no further purification was deemed necessary. The final molar activity of  $^{177}\text{Lu}$ -DOTA-PEG<sub>7</sub>-Tz was  $17.2 \pm 5.7 \text{ GBq}/\mu\text{mol}$  (n=4).

*Preparation of  $^{177}\text{Lu}$ -CHX-A''-DTPA-huA33:* An aliquot of prepared huA33- CHX-A''-DTPA (0.3 mg, 2.0 nmol) was buffer exchanged to be suspended in chelex-treated 0.25 M  $\text{NH}_4\text{OAc}$  with 34 mM ascorbic acid (pH 5.5) using centrifugal filtration units with a 30,000 Da molecular weight cut off (Amicon<sup>TM</sup> Ultra 0.5mL, Millipore Corp., Billerica, MA). To this solution 2.7 mCi (100 MBq) of  $^{177}\text{LuCl}_3$  was added and incubated for 1 hour at 37 °C with shaking at 400 rpm. The radiolabeled immunoconjugate was then purified using size-exclusion chromatography (Sephadex G-25M, PD-10 column, GE Healthcare; dead volume = 2.5 mL, eluted with 2 mL fractions of PBS with 34 mM ascorbic acid, pH 7.4), producing the final product with an overall radiochemical yield of 82.0%, a radionuclidic purity of 99.6% as determined by iTLC, and a molar activity of  $31.6 \text{ GBq}/\mu\text{mol}$  (n = 1).

*Preparation of  $^{64}\text{Cu}$ -SarAr-Tz:*  $^{64}\text{Cu}$ -SarAr-Tz was prepared as previously described<sup>4</sup>. A solution of Tz-SarAr (5–25  $\mu\text{g}$ ; 6.9–34.9 nmol) in  $\text{NH}_4\text{OAc}$  buffer (0.2 M, pH 5.5, 200  $\mu\text{L}$ ) was first prepared. Then, the desired amount of  $^{64}\text{CuCl}_2$  in 0.1 M HCl (3000  $\mu\text{Ci}$ ; 111 MBq) was added to the reaction mixture, and the solution was placed on an agitating thermomixer at 300 rpm for 30 minutes at 25 °C. After this incubation, the  $^{64}\text{Cu}$ -SarAr-Tz was purified via reversed phase C<sub>18</sub> HPLC (t<sub>R</sub> = 8.7 min). This yielded the completed radioligand with a radionuclidic purity of >99% (as determined by reversed phase HPLC) and a molar activity of  $19.4 \pm 1.5 \text{ GBq}/\mu\text{mol}$  (n = 4).

## ***Functional characterization***

*Determination of the TCO occupancy of huA33-TCO:* The TCO occupancy of huA33-TCO was determined as previously described<sup>3, 4</sup>. A solution of huA33-TCO (100  $\mu\text{g}$ ; 0.66 nmol) in 900  $\mu\text{L}$  PBS (pH 7.4) was first prepared (0.74  $\mu\text{M}$ ). Next, 100  $\mu\text{L}$  of a 1 mM solution of Tz-PEG<sub>7</sub>-AF680 in DMSO was added to create a reaction volume of 1000  $\mu\text{L}$  and concentrations of 0.66  $\mu\text{M}$  A33-TCO and 100  $\mu\text{M}$  Tz-PEG<sub>7</sub>-AF680 (a ~150-fold excess of Tz). This solution was placed on an agitating thermomixer at 300 rpm at 25 °C. After 180 minutes of incubation, the resulting fluorophore-labeled immunoconjugate was purified using size-exclusion chromatography (Sephadex G-25 M, PD-10 column, GE Healthcare; dead volume = 2.5 mL, eluted with 2 mL of PBS, pH 7.4) and concentrated by using centrifugal filtration units with a 50,000 Da molecular weight cut off (Amicon<sup>TM</sup> Ultra 4, Millipore Corp., Billerica, MA). The degree of labeling (DOL) was determined by UV-Vis analysis. Absorbance measurements were taken at 280 nm and 680 nm, and the DOL was calculated using the following formulas:

$$A_{mAb} = A_{280} - A_{max}(CF)$$

$$DOL = [A_{max} * MW_{mAb}] / [[mAb] * \epsilon_{AF680}]$$

where the correction factor (CF) for AF680 was given as 0.05 by the supplier,  $MW_{huA33} = 150,000$ ,  $\epsilon_{AF680} = 184,000$ , and  $\epsilon_{280, huA33} = 225,000$ . Given the rapid and quantitative nature of the IEDDA reaction, the degree of labeling of AF680 was assumed to be the degree of labeling of TCO.

### ***Cell culture and xenografts***

Human colorectal cell line SW1222 was obtained from Sigma-Aldrich, Inc. and maintained in Minimum Essential Medium, supplemented with 10% heat-inactivated fetal calf serum, 2 mM glutamine, 100 units/mL penicillin, and 100 units/mL streptomycin in a 37 °C environment 7 containing 5% CO<sub>2</sub>. Cell lines were harvested and passaged every 8-10 days using 0.25% trypsin/0.53 mM EDTA in Hank's Buffered Salt Solution without calcium and magnesium. All media was purchased from the Media Preparation Facility at Memorial Sloan Kettering Cancer Center.

*Subcutaneous Xenograft Models:* Female athymic homozygous nude mice, strain Crl:NU(NCr)-Foxn1<sup>nu</sup> (Charles River Laboratories, Wilmington, MA) age between 6-8 weeks were xenografted subcutaneously with  $5 \times 10^6$  SW1222 cells, suspended in 150  $\mu$ L of a solution containing a 1:1 mixture of Matrigel (Becton Dickinson, Bedford, MA) and cell culture medium. SW1222 tumors were grown for 14-18 days post-implantation prior to imaging or biodistribution.

### ***PET imaging***

One subject from each cohort was administered huA33- TCO (100  $\mu$ g, 0.6 nmol in 200  $\mu$ L sterile PBS) via intravenous tail vein injection. After an accumulation interval of 24 h, the same mice were then administered <sup>64</sup>Cu-SarAr-Tz (500  $\mu$ Ci; 18.5 MBq in 200  $\mu$ L sterile PBS), also via intravenous tail vein injection (t = 0). The molar activity of the radiotracer was adjusted using SarAr-Tz such that the molar ratio of Tz:huA33  $\approx$  1:1. Static scans were recorded at 24 h after injection of the radioactivity for a total scan time of 15 minutes per scan. An energy window of 350-700 keV and a coincidence timing window of 6 ns were used. Data were sorted into 2-dimensional histograms by Fourier rebinning, and transverse images were reconstructed by filtered back-projection (FBP) into a  $128 \times 128 \times 63$  ( $0.72 \times 0.72 \times 1.3$  mm) matrix. The imaging data was then normalized to correct for non-uniformity of response of the PET, dead-time count losses, positron branching ratio, and physical decay of the isotope to the time of injection- but no attenuation, scatter, or partial-volume averaging correction was applied. Activity concentrations (percentage of dose per gram of tissue [%ID/g]) were determined by conversion of the counting rates from the reconstructed (filtered back-projection) images. Maximum intensity projection (MIP) images were generated from 3-dimensional ordered subset expectation maximization reconstruction (3DOSEM). All of the resulting images were analyzed using ASIPro VM™ software.

### ***Pretargeted biodistribution***

The acute biodistribution of  $^{177}\text{Lu}$ -DOTA-PEG<sub>7</sub>-Tz was determined using a SW1222 subcutaneous xenograft (right flank, ~200mm<sup>3</sup>) model in athymic, nude mice. Mice were randomized into groups and warmed gently using a heat lamp prior to being injected with 100 µg (0.6 nmol) of huA33-TCO via intravenous tail vein injection. After an accumulation interval period of 24 h, the same mice were then administered  $^{177}\text{Lu}$ -DOTA-PEG<sub>7</sub>-Tz (300-350 µCi; 11.1-13.0 MBq, 0.6-0.7 nmol, in 200 µL sterile PBS) also via intravenous tail vein injection. At the appropriate time post injection of radioactivity, mice (n = 4) were euthanized via asphyxiation using CO<sub>2</sub>(g) and 13 tissues including the tumor were collected, dried in open air for 5 minutes, and placed into pre-weighed tubes. The mass of each organ was determined and then each sample was counted using a Wizard<sup>2</sup> automatic gamma counter calibrated for  $^{177}\text{Lu}$ . A calibration curve generated from standards of known activity was used to convert counts into activity. The counts from each sample were decay- and background-corrected from the time of injection, and the activity in each sample was then converted to %ID/g by normalization to the total activity injected into the respective animal.

### ***Biodistribution with $^{177}\text{Lu}$ -CHX-A''-DTPA-huA33***

The acute biodistribution of prepared  $^{177}\text{Lu}$ -CHX-A''-DTPA-huA33 was determined using a SW1222 subcutaneous xenograft (right flank, ~200 mm<sup>3</sup>) model in athymic, nude mice. Mice were randomized into groups and warmed gently using a heat lamp prior to being injected with 5 µg of  $^{177}\text{Lu}$ -CHX-A''-DTPA-huA33 (S.A. 5.7 µCi/µg) in PBS with 34 mM ascorbic acid (pH 7.4) via intravenous tail vein injection. At the appropriate time post injection, mice (n = 4 per group) were euthanized via asphyxiation using CO<sub>2</sub>(g) and 13 tissues including the tumor were collected, dried in open air for 5 minutes, and placed into pre-weighed tubes. The mass of each organ was determined and then each sample was counted using a Wizard<sup>2</sup> automatic gamma counter calibrated for  $^{177}\text{Lu}$ . A calibration curve generated from standards of known activity was used to convert counts into activity. The counts from each sample were decay- and background corrected from the time of injection, and the activity in each sample was then converted to %ID/g by normalization to the total activity injected into the respective animal.

### ***Dosimetry***

The biodistribution data for the  $^{177}\text{Lu}$ -DOTA-PEG<sub>7</sub>-Tz/huA33-TCO pretargeting system as well as the directly-labeled  $^{177}\text{Lu}$ -CHX-A''-DTPA-huA33 radioimmunoconjugate were expressed as normal-organ mean standard uptake values (SUVs) versus time post-administration. Assuming, in first order, that SUVs are independent of body mass and thus the same among species, the mean SUV in mouse organ i, SUV<sub>i</sub>, was converted to the fraction of the injected dose in each human organ I, FID<sub>I</sub>, using the following formula:

$$\text{FID}_I = \text{SUV}_i \bullet \frac{\text{Mass of Human Organ}_i}{\text{Mass of Human Total Body}}$$

These data were decay corrected and fit to exponential time-activity functions. The residence time in a human organ  $i$  ( $t_i$ , in  $\mu\text{Ci}\cdot\text{h}/\mu\text{Ci}$ ) was calculated by integrating the time-activity function in organ  $i$ , replacing the biological clearance constant,  $(l_b)_x$  for each component,  $x$ , of the fitted exponential function with the corresponding effective clearance constant,  $(l_e)_x$  [ $(l_e)_x = (l_b)_x + l_p$ , where  $l_p$  is the physical decay constant of the radionuclide]. The resulting organ residence times were entered into the OLINDA computer program utilizing the 70-kg Standard Man anatomic model to yield the mean organ absorbed doses and effective dose.<sup>5</sup>

### ***Longitudinal therapy study***

Mice bearing established SW1222 subcutaneous tumors (mean tumor volume  $250 \pm 50 \text{ mm}^3$ ) were randomly sorted into 5 groups of 10 mice per group. In order to determine the dose dependence of the PRIT methodology, the treatment groups received injections of the radioligand loaded with 500, 1000, or 1500  $\mu\text{Ci}$  (18.5, 37.0, 55.5 MBq) via the lateral tail vein 24 h after administration of huA33-TCO (100  $\mu\text{g}$  in 200  $\mu\text{L}$  of 0.9% saline). The remaining two cohorts served as control groups, receiving either huA33-TCO alone (100  $\mu\text{g}$  in 200  $\mu\text{L}$  of 0.9% saline) or 1500  $\mu\text{Ci}$  (55.5 MBq) of  $^{177}\text{Lu}$ -DOTA-PEG<sub>7</sub>-Tz without huA33-TCO. All mice were weighed, and the tumor burden was assessed by caliper measurement every 3-4 days until day 21, and then every 7 days thereafter until the conclusion of the experiment. Tumor volume was calculated using the formula for the volume of an ellipsoid. Mice were sacrificed if the tumor grew to  $>1.0 \text{ cm}^3$  or if the mouse lost  $>20\%$  of its body mass during the course of the study.

### ***Statistical Analysis***

Biodistribution data were analyzed using an unpaired, two-tailed Student's  $t$ -test. Differences at the 95% confidence level ( $P < 0.05$ ) were considered to be statistically significant. For the therapy study, Kaplan-Meier survival analysis was performed with Prism software (version 7.0). Differences at the 95% confidence level ( $P < 0.05$ ) were considered to be statistically significant.

## Supplemental Figures and Tables

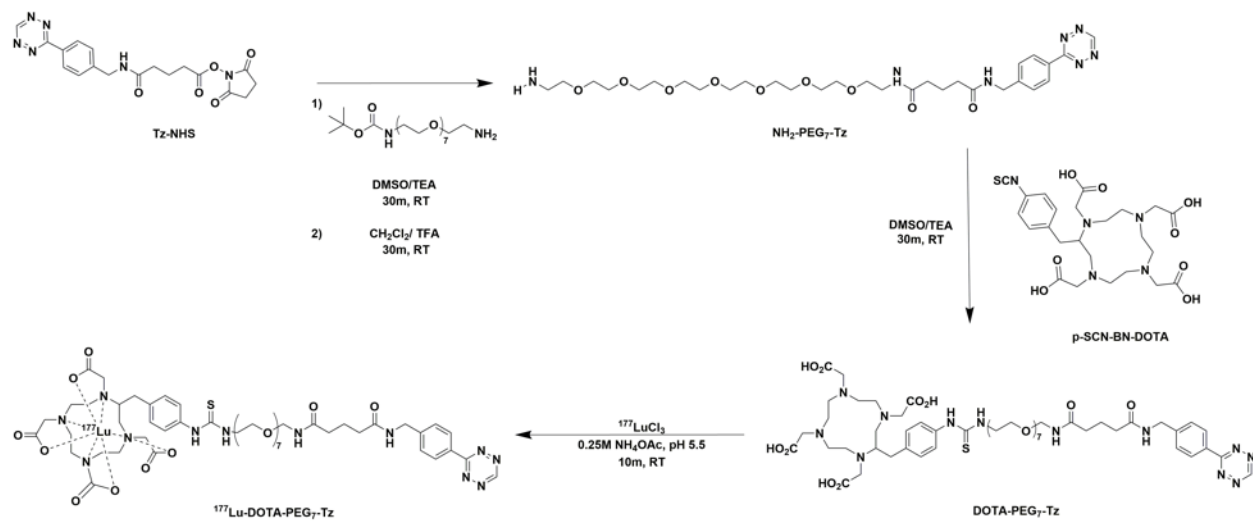

**Figure S1:** Schematic of the synthesis and radiolabeling of  $^{177}\text{Lu}$ -DOTA-PEG<sub>7</sub>-Tz.



| 24 h Interval: huA33-TCO/ <sup>177</sup> Lu-DOTA-PEG <sub>7</sub> -Tz |           |           |           |            | 72 h Interval: huA33-TCO/ <sup>177</sup> Lu-DOTA-PEG <sub>7</sub> -Tz |           |            |            |             |
|-----------------------------------------------------------------------|-----------|-----------|-----------|------------|-----------------------------------------------------------------------|-----------|------------|------------|-------------|
| Organ                                                                 | 4 h       | 24 h      | 48h       | 120 h      | Organ                                                                 | 4 h       | 24 h       | 48h        | 120 h       |
| Blood                                                                 | 5.0 ± 1.3 | 3.7 ± 0.6 | 3.0 ± 0.6 | 1.0 ± 0.2  | Blood                                                                 | 3.3 ± 1.2 | 2.2 ± 0.4  | 1.3 ± 0.8  | 0.7 ± 0.2   |
| Tumor                                                                 | 5.0 ± 1.5 | 13 ± 1.6  | 17 ± 2.2  | 21 ± 2.9   | Tumor                                                                 | 3.2 ± 0.7 | 6.3 ± 3.6  | 9.8 ± 2.8  | 13 ± 2.3    |
| Heart                                                                 | 1.4 ± 0.4 | 1.1 ± 0.2 | 0.8 ± 0.1 | 0.3 ± 0.1  | Heart                                                                 | 0.8 ± 0.3 | 0.5 ± 0.1  | 0.4 ± 0.2  | 0.3 ± 0.1   |
| Lung                                                                  | 2.4 ± 0.7 | 2.3 ± 0.4 | 1.9 ± 0.5 | 0.8 ± 0.1  | Lung                                                                  | 1.4 ± 0.3 | 1.3 ± 0.4  | 0.8 ± 0.4  | 0.6 ± 0.1   |
| Liver                                                                 | 1.5 ± 0.4 | 1.4 ± 0.3 | 1.2 ± 0.1 | 0.6 ± 0.1  | Liver                                                                 | 1.1 ± 0.4 | 0.9 ± 0.2  | 0.6 ± 0.2  | 0.4 ± 0.1   |
| Spleen                                                                | 1.3 ± 0.4 | 1.4 ± 0.4 | 1.2 ± 0.3 | 0.7 ± 0.2  | Spleen                                                                | 0.6 ± 0.2 | 0.7 ± 0.2  | 0.5 ± 0.2  | 0.3 ± 0.1   |
| Stomach                                                               | 0.3 ± 0.1 | 0.7 ± 0.8 | 0.3 ± 0.1 | 0.1 ± 0.03 | Stomach                                                               | 0.4 ± 0.2 | 0.4 ± 0.1  | 0.1 ± 0.04 | 0.1 ± 0.02  |
| Small Intestine                                                       | 0.6 ± 0.3 | 0.7 ± 0.5 | 0.3 ± 0.1 | 0.2 ± 0.02 | Small Intestine                                                       | 0.4 ± 0.1 | 0.3 ± 0.04 | 0.1 ± 0.05 | 0.1 ± 0.02  |
| Large Intestine                                                       | 0.9 ± 0.4 | 1.3 ± 1.4 | 0.4 ± 0.3 | 0.2 ± 0.1  | Large Intestine                                                       | 1.5 ± 0.6 | 0.6 ± 0.2  | 0.3 ± 0.1  | 0.1 ± 0.05  |
| Kidney                                                                | 2.3 ± 0.5 | 1.9 ± 0.2 | 1.6 ± 0.2 | 0.8 ± 0.01 | Kidney                                                                | 2.0 ± 0.3 | 1.5 ± 0.2  | 1.1 ± 0.2  | 0.7 ± 0.1   |
| Muscle                                                                | 0.4 ± 0.2 | 0.4 ± 0.1 | 0.3 ± 0.1 | 0.1 ± 0.01 | Muscle                                                                | 0.2 ± 0.1 | 0.2 ± 0.03 | 0.1 ± 0.05 | 0.08 ± 0.02 |
| Bone                                                                  | 0.5 ± 0.2 | 0.6 ± 0.2 | 0.7 ± 0.3 | 0.3 ± 0.02 | Bone                                                                  | 0.4 ± 0.2 | 0.4 ± 0.1  | 0.2 ± 0.1  | 0.2 ± 0.02  |

  

| 48 h Interval: huA33-TCO/ <sup>177</sup> Lu-DOTA-PEG <sub>7</sub> -Tz |           |           |            |             | Directly Labeled: huA33-CHX-A"-DTPA- <sup>177</sup> Lu |           |           |           |           |
|-----------------------------------------------------------------------|-----------|-----------|------------|-------------|--------------------------------------------------------|-----------|-----------|-----------|-----------|
| Organ                                                                 | 4 h       | 24 h      | 48h        | 120 h       | Organ                                                  | 24 h      | 72 h      | 120 h     | 168 h     |
| Blood                                                                 | 4.4 ± 1.7 | 2.5 ± 0.8 | 1.5 ± 0.5  | 0.4 ± 0.3   | Blood                                                  | 9.5 ± 1.5 | 4.0 ± 2.3 | 2.6 ± 1.9 | 1.8 ± 1.6 |
| Tumor                                                                 | 5.2 ± 1.2 | 9.0 ± 2.6 | 13 ± 2.8   | 11 ± 2.4    | Tumor                                                  | 57 ± 11   | 70 ± 15   | 75 ± 22   | 69 ± 32   |
| Heart                                                                 | 1.2 ± 0.4 | 0.7 ± 0.3 | 0.5 ± 0.2  | 0.2 ± 0.1   | Heart                                                  | 2.9 ± 0.6 | 1.0 ± 0.6 | 1.0 ± 0.3 | 0.7 ± 0.4 |
| Lung                                                                  | 2.7 ± 1.0 | 1.5 ± 0.6 | 1.0 ± 0.3  | 0.4 ± 0.1   | Lung                                                   | 4.6 ± 0.5 | 1.9 ± 0.9 | 1.6 ± 0.8 | 1.0 ± 0.6 |
| Liver                                                                 | 1.1 ± 0.5 | 0.9 ± 0.2 | 0.7 ± 0.3  | 0.3 ± 0.1   | Liver                                                  | 3.6 ± 0.2 | 2.9 ± 1.3 | 2.9 ± 1.4 | 1.4 ± 0.3 |
| Spleen                                                                | 1.0 ± 0.5 | 0.7 ± 0.3 | 0.9 ± 0.4  | 0.2 ± 0.1   | Spleen                                                 | 3.1 ± 0.3 | 1.9 ± 0.5 | 3.7 ± 3.5 | 1.3 ± 0.4 |
| Stomach                                                               | 0.3 ± 0.1 | 0.5 ± 0.4 | 0.2 ± 0.1  | 0.06 ± 0.01 | Stomach                                                | 0.9 ± 0.3 | 0.4 ± 0.2 | 0.4 ± 0.1 | 0.3 ± 0.2 |
| Small Intestine                                                       | 1.5 ± 1.9 | 0.3 ± 0.1 | 0.2 ± 0.1  | 0.07 ± 0.02 | Small Intestine                                        | 1.0 ± 0.2 | 0.6 ± 0.3 | 0.8 ± 0.5 | 0.4 ± 0.2 |
| Large Intestine                                                       | 1.6 ± 0.4 | 1.5 ± 1.1 | 0.2 ± 0.1  | 0.1 ± 0.03  | Large Intestine                                        | 0.8 ± 0.1 | 0.5 ± 0.1 | 0.6 ± 0.2 | 0.4 ± 0.1 |
| Kidney                                                                | 2.5 ± 0.5 | 1.5 ± 0.3 | 1.1 ± 0.2  | 0.6 ± 0.1   | Kidney                                                 | 3.9 ± 0.6 | 2.3 ± 0.9 | 1.9 ± 0.6 | 1.3 ± 0.5 |
| Muscle                                                                | 0.5 ± 0.1 | 0.3 ± 0.1 | 0.2 ± 0.03 | 0.06 ± 0.02 | Muscle                                                 | 1.0 ± 0.2 | 0.6 ± 0.2 | 0.5 ± 0.2 | 0.3 ± 0.2 |
| Bone                                                                  | 0.5 ± 0.2 | 0.3 ± 0.1 | 0.4 ± 0.1  | 0.1 ± 0.03  | Bone                                                   | 2.3 ± 0.6 | 0.8 ± 0.3 | 1.0 ± 0.1 | 1.1 ± 0.2 |

**Table S1.** Full biodistribution data in nude mice bearing SW1222 xenografts for the radiopharmaceuticals investigated in this work. The top left, bottom left, and top right panels provide the activity concentration values produced by huA33-TCO/<sup>177</sup>Lu-DOTA-PEG<sub>7</sub>-Tz pretargeting with injection intervals of 24, 48, and 72 hours, respectively. The bottom right panel provides the activity concentration values produced by the directly-labeled <sup>177</sup>Lu-CHX-A"-DTPA-huA33 radioimmunoconjugate. The values for the stomach, small intestine, and large intestine include the contents.

| <b>Tumor-to-Organ</b> | <b>24 h<br/>Interval</b> | <b>48 h<br/>Interval</b> | <b>72 h<br/>Interval</b> | <b>Directly<br/>Labeled</b> |
|-----------------------|--------------------------|--------------------------|--------------------------|-----------------------------|
| Blood                 | 20 ± 5                   | 24 ± 15                  | 17 ± 6                   | 29 ± 23                     |
| Heart                 | 67 ± 15                  | 64 ± 28                  | 50 ± 17                  | 77 ± 34                     |
| Lung                  | 28 ± 6                   | 27 ± 12                  | 23 ± 6                   | 48 ± 27                     |
| Liver                 | 37 ± 7                   | 35 ± 14                  | 30 ± 11                  | 26 ± 14                     |
| Spleen                | 29 ± 10                  | 43 ± 16                  | 38 ± 14                  | 21 ± 20                     |
| Stomach               | 147 ± 34                 | 192 ± 62                 | 150 ± 42                 | 178 ± 68                    |
| Small Intestine       | 141 ± 25                 | 156 ± 70                 | 137 ± 36                 | 94 ± 62                     |
| Large Intestine       | 106 ± 68                 | 86 ± 29                  | 89 ± 34                  | 130 ± 54                    |
| Kidney                | 27 ± 6                   | 19 ± 6                   | 20 ± 5                   | 40 ± 17                     |
| Muscle                | 184 ± 30                 | 168 ± 64                 | 153 ± 44                 | 155 ± 67                    |
| Bone                  | 82 ± 13                  | 86 ± 32                  | 82 ± 18                  | 71 ± 23                     |

**Table S2:** Tumor-to-organ activity concentration ratios at 120 h after the administration of the radiopharmaceutical for the huA33-TCO/<sup>177</sup>Lu-DOTA-PEG<sub>7</sub>-Tz pretargeting system as well as the directly labeled <sup>177</sup>Lu-CHX-A''-DTPA-huA33 radioimmunoconjugate.

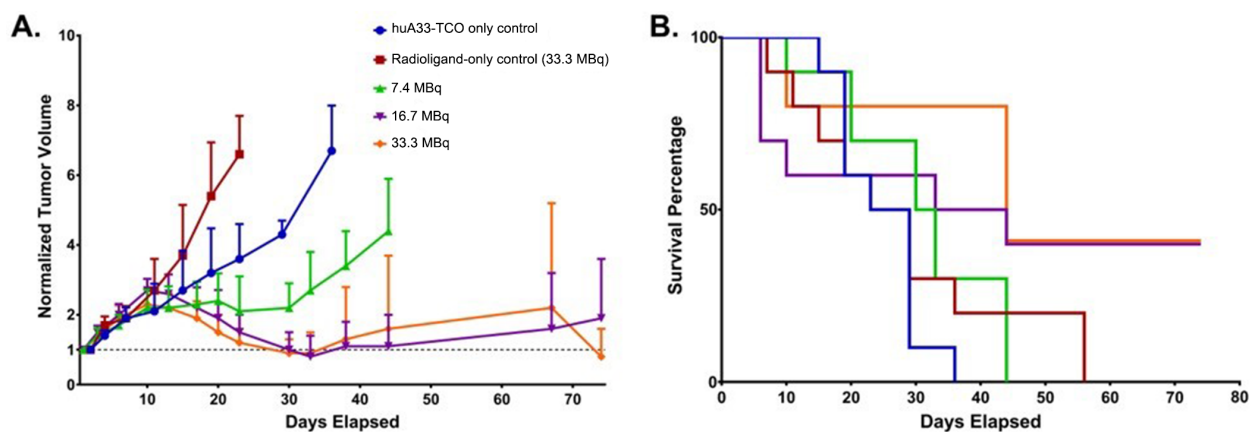

**Figure S2:** A longitudinal therapy study of 5 groups of mice ( $n = 10$  per cohort) bearing subcutaneous SW1222 tumors depicted in (A) a graph of normalized tumor volume as a function of time and (B) the corresponding Kaplan-Meier survival curve. The control groups received the huA33-TCO immunoconjugate without the  $^{177}\text{Lu}$ -DOTA-PEG<sub>7</sub>-Tz radioligand (blue) or the radioligand without the immunoconjugate (red). The three treatment groups received huA33-TCO (100  $\mu\text{g}$ , 0.6 nmol) followed 72 h later by 7.4 (green), 16.7 (purple), or 33.3 (orange) MBq of  $^{177}\text{Lu}$ -DOTA-PEG<sub>7</sub>-Tz. By log-rank (Mantel-Cox) test, survival was significant ( $P < 0.01$ ) for the PRIT group receiving 33.3 MBq. Median survival was determined to be 21 days for the huA33-TCO-only control group, 15 days for the radioligand-only control group, and 35.5, 41, and 67 days for the cohorts receiving 7.4, 16.7, or 33.3 MBq, respectively.

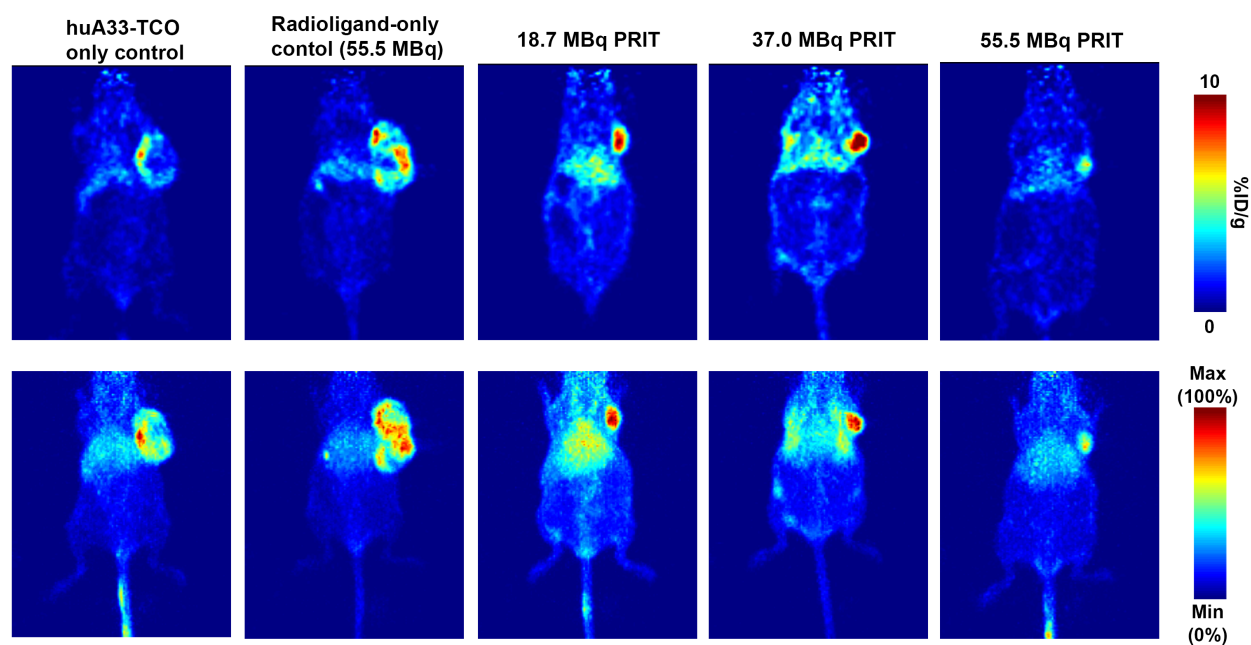

**Figure S3:** Pretargeted PET maximum intensity projections of mice from the control and treatment arms obtained on day 27 of the longitudinal therapy study (using a 24 h injection interval between huA33-TCO and  $^{177}\text{Lu}$ -DOTA-PEG<sub>7</sub>-Tz). Mice were first injected with huA33-TCO (100  $\mu\text{g}$ , 0.6 nmol), followed 24 h later by the administration of  $^{64}\text{Cu}$ -SarAr-Tz (18.5 MBq, 0.7 nmol). PET images were collected 24 h after the administration of the radioligand.

## References

1. King, D. J.; Antoniow, P.; Owens, R. J.; Adair, J. R.; Haines, A. M.; Farnsworth, A. P.; Finney, H.; Lawson, A. D.; Lyons, A.; Baker, T. S. Preparation and preclinical evaluation of humanised A33 immunoconjugates for radioimmunotherapy. *British Journal of Cancer* **1995**, 72, (6), 1364-1372.
2. Lee, F. T.; Hall, C.; Rigopoulos, A.; Zweit, J.; Pathmaraj, K.; O'Keefe, G. J.; Smyth, F. E.; Welt, S.; Old, L. J.; Scott, A. M. Immuno-PET of human colon xenograft-bearing BALB/c nude mice using 124I-CDR-grafted humanized A33 monoclonal antibody. *Journal of Nuclear Medicine* **2001**, 42, (5), 764-769.
3. Houghton, J. L.; Membreno, R.; Abdel-Atti, D.; Cunanan, K. M.; Carlin, S.; Scholz, W. W.; Zanzonico, P. B.; Lewis, J. S.; Zeglis, B. M. Establishment of the in vivo efficacy of pretargeted radioimmunotherapy utilizing inverse electron demand Diels-Alder click chemistry. *Molecular Cancer Therapeutics* **2016**, 16, (1), 124-133.
4. Zeglis, B. M.; Brand, C.; Abdel-Atti, D.; Carnazza, K. E.; Cook, B. E.; Carlin, S.; Reiner, T.; Lewis, J. S. Optimization of a pretargeted strategy for the PET imaging of colorectal carcinoma via the modulation of radioligand pharmacokinetics. *Molecular Pharmaceutics* **2015**, 12, (10), 3575-3587.
5. Stabin, M. G.; Sparks, R. B.; Crowe, E. OLINDA/EXM: the second-generation personal computer software for internal dose assessment in nuclear medicine. *Journal of Nuclear Medicine* **2005**, 46, (6), 1023-7.
